# Supplementary material for: Burden of lymphoma in China, 1990−2019: an analysis of the global burden of diseases, injuries, and risk factors study 2019
Source: publisher site journal article supplement (doi:10.18632/aging.204006), 2022-04-10
Supplement: Supplementary file [file aging-v14i7-204006-supplementary-material-SD2.pdf]

## SUPPLEMENTARY TABLES

**Supplementary Table 1. Age-specific incidence and mortality rates of Hodgkin lymphoma by age and sex in 2019 (per 100,000 population).**

| Age groups (year) | Incidence           |                       |                     | Mortality           |                     |                     |
|-------------------|---------------------|-----------------------|---------------------|---------------------|---------------------|---------------------|
|                   | Both                | Male                  | Female              | Both                | Male                | Female              |
| 0–                | 0.00                | 0.00                  | 0.00                | 0.00                | 0.00                | 0.00                |
| 1–                | 0.18<br>(0.14–0.27) | 0.17<br>(0.11–0.29)   | 0.20<br>(0.14–0.32) | 0.02<br>(0.01–0.03) | 0.02<br>(0.01–0.03) | 0.02<br>(0.02–0.03) |
| 5–                | 0.24<br>(0.17–0.32) | 0.33<br>(0.23–0.48)   | 0.13<br>(0.10–0.16) | 0.02<br>(0.02–0.03) | 0.03<br>(0.02–0.05) | 0.01<br>(0.01–0.02) |
| 10–               | 0.17<br>(0.13–0.23) | 0.21<br>(0.15–0.32)   | 0.12<br>(0.09–0.18) | 0.02<br>(0.02–0.03) | 0.02<br>(0.02–0.04) | 0.01<br>(0.01–0.02) |
| 15–               | 0.46<br>(0.35–0.59) | 0.54<br>(0.36–0.73)   | 0.37<br>(0.27–0.54) | 0.04<br>(0.03–0.05) | 0.05<br>(0.03–0.06) | 0.03<br>(0.02–0.05) |
| 20–               | 0.63<br>(0.48–0.84) | 0.80<br>(0.52–1.07)   | 0.46<br>(0.31–0.69) | 0.06<br>(0.05–0.08) | 0.07<br>(0.05–0.10) | 0.04<br>(0.03–0.07) |
| 25–               | 0.48<br>(0.38–0.63) | 0.59<br>(0.40–0.80)   | 0.37<br>(0.24–0.57) | 0.06<br>(0.05–0.08) | 0.07<br>(0.05–0.10) | 0.05<br>(0.03–0.07) |
| 30–               | 0.56<br>(0.42–0.71) | 0.77<br>(0.49–1.01)   | 0.35<br>(0.24–0.53) | 0.08<br>(0.06–0.10) | 0.10<br>(0.07–0.14) | 0.05<br>(0.04–0.07) |
| 35–               | 0.47<br>(0.35–0.60) | 0.63<br>(0.41–0.85)   | 0.31<br>(0.21–0.46) | 0.08<br>(0.06–0.10) | 0.10<br>(0.07–0.14) | 0.05<br>(0.04–0.07) |
| 40–               | 0.53<br>(0.38–0.67) | 0.70<br>(0.46–0.95)   | 0.35<br>(0.23–0.49) | 0.10<br>(0.08–0.13) | 0.13<br>(0.09–0.18) | 0.07<br>(0.05–0.09) |
| 45–               | 0.53<br>(0.38–0.68) | 0.73<br>(0.48–1.01)   | 0.31<br>(0.20–0.43) | 0.11<br>(0.09–0.15) | 0.16<br>(0.11–0.23) | 0.07<br>(0.05–0.09) |
| 50–               | 0.73<br>(0.52–0.92) | 0.95<br>(0.60–1.30)   | 0.50<br>(0.33–0.69) | 0.27<br>(0.20–0.34) | 0.23<br>(0.15–0.31) | 0.12<br>(0.08–0.16) |
| 55–               | 0.83<br>(0.59–1.06) | 1.14<br>(0.74–1.57)   | 0.52<br>(0.33–0.72) | 0.37<br>(0.27–0.47) | 0.36<br>(0.24–0.50) | 0.17<br>(0.11–0.23) |
| 60–               | 1.05<br>(0.73–1.33) | 1.46<br>(0.90–1.95)   | 0.64<br>(0.38–0.87) | 0.54<br>(0.39–0.67) | 0.52<br>(0.36–0.70) | 0.23<br>(0.15–0.31) |
| 65–               | 1.19<br>(0.83–1.49) | 1.61<br>(0.97–2.14)   | 0.79<br>(0.50–1.08) | 0.74<br>(0.54–0.90) | 0.73<br>(0.47–0.99) | 0.37<br>(0.24–0.49) |
| 70–               | 1.33<br>(0.91–1.63) | 1.80<br>(1.09–2.37)   | 0.87<br>(0.53–1.16) | 0.91<br>(0.70–1.23) | 1.00<br>(0.64–1.32) | 0.50<br>(0.32–0.66) |
| 75–               | 1.63<br>(1.07–2.01) | 2.10<br>(1.21–2.72)   | 1.21<br>(0.73–1.62) | 0.91<br>(0.63–1.12) | 1.16<br>(0.71–1.53) | 0.69<br>(0.43–0.90) |
| 80–               | 2.19<br>(1.38–2.72) | 2.95<br>(1.63–3.90)   | 1.59<br>(0.94–2.14) | 1.05<br>(0.69–1.28) | 1.39<br>(0.81–1.80) | 0.78<br>(0.48–1.04) |
| 85–               | 2.63<br>(1.63–3.29) | 4.47<br>(2.39–5.82)   | 1.64<br>(0.92–2.20) | 1.26<br>(0.82–1.52) | 2.10<br>(1.21–2.69) | 0.80<br>(0.48–1.07) |
| 90–               | 5.99<br>(3.25–8.28) | 13.21<br>(6.15–19.23) | 4.49<br>(2.22–6.66) | 0.86<br>(0.50–1.13) | 1.76<br>(0.86–2.40) | 0.68<br>(0.35–0.94) |
| 95–               | 4.92<br>(2.38–7.44) | 11.98<br>(5.25–20.89) | 4.30<br>(1.91–6.68) | 0.81<br>(0.41–1.18) | 1.31<br>(0.60–1.93) | 0.77<br>(0.37–1.14) |

Data in parentheses are 95% uncertainty intervals.

**Supplementary Table 2. Age-specific incidence and mortality rates of non-Hodgkin lymphoma by age and sex in 2019 (per 100,000 population).**

| Age groups (year) | Incidence              |                        |                        | Mortality              |                        |                        |
|-------------------|------------------------|------------------------|------------------------|------------------------|------------------------|------------------------|
|                   | Both                   | Male                   | Female                 | Both                   | Male                   | Female                 |
| 0–                | 0.00                   | 0.00                   | 0.00                   | 0.00                   | 0.00                   | 0.00                   |
| 1–                | 0.00                   | 0.00                   | 0.00                   | 0.28<br>(0.22–0.37)    | 0.31<br>(0.23–0.41)    | 0.26<br>(0.21–0.33)    |
| 5–                | 1.77<br>(1.44–2.21)    | 2.28<br>(1.78–2.95)    | 1.18<br>(0.98–1.45)    | 0.29<br>(0.24–0.36)    | 0.38<br>(0.30–0.48)    | 0.19<br>(0.16–0.23)    |
| 10–               | 1.53<br>(1.28–1.84)    | 1.81<br>(1.43–2.31)    | 1.21<br>(1.00–1.44)    | 0.26<br>(0.22–0.30)    | 0.31<br>(0.25–0.38)    | 0.20<br>(0.17–0.24)    |
| 15–               | 2.24<br>(1.85–2.70)    | 2.79<br>(2.14–3.60)    | 1.62<br>(1.36–1.95)    | 0.39<br>(0.32–0.46)    | 0.49<br>(0.37–0.61)    | 0.27<br>(0.23–0.32)    |
| 20–               | 1.81<br>(1.48–2.24)    | 2.31<br>(1.79–2.97)    | 1.27<br>(0.97–1.65)    | 0.53<br>(0.44–0.64)    | 0.68<br>(0.54–0.87)    | 0.35<br>(0.27–0.45)    |
| 25–               | 1.88<br>(1.56–2.29)    | 2.45<br>(1.97–3.06)    | 1.29<br>(0.94–1.71)    | 0.55<br>(0.47–0.65)    | 0.72<br>(0.59–0.88)    | 0.37<br>(0.28–0.48)    |
| 30–               | 2.40<br>(2.00–2.93)    | 3.16<br>(2.54–3.94)    | 1.63<br>(1.22–2.15)    | 0.72<br>(0.61–0.84)    | 0.96<br>(0.78–1.17)    | 0.48<br>(0.36–0.61)    |
| 35–               | 3.24<br>(2.70–3.95)    | 4.22<br>(3.32–5.36)    | 2.23<br>(1.67–2.89)    | 1.00<br>(0.84–1.18)    | 1.30<br>(1.04–1.61)    | 0.68<br>(0.51–0.86)    |
| 40–               | 3.01<br>(2.44–3.68)    | 3.99<br>(3.08–5.15)    | 1.99<br>(1.53–2.55)    | 1.43<br>(1.18–1.71)    | 1.92<br>(1.49–2.41)    | 0.93<br>(0.71–1.17)    |
| 45–               | 4.15<br>(3.30–5.16)    | 5.81<br>(4.35–7.70)    | 2.43<br>(1.85–3.12)    | 2.02<br>(1.64–2.47)    | 2.85<br>(2.15–3.69)    | 1.16<br>(0.90–1.46)    |
| 50–               | 6.59<br>(5.23–8.18)    | 9.24<br>(6.87–12.20)   | 3.91<br>(2.99–5.03)    | 3.22<br>(2.60–3.94)    | 4.55<br>(3.42–5.85)    | 1.88<br>(1.46–2.40)    |
| 55–               | 9.98<br>(7.93–12.35)   | 13.91<br>(10.39–18.30) | 6.00<br>(4.63–7.67)    | 4.87<br>(3.93–5.96)    | 6.83<br>(5.17–8.75)    | 2.89<br>(2.26–3.67)    |
| 60–               | 12.76<br>(10.31–15.49) | 17.06<br>(12.92–21.82) | 8.43<br>(6.55–10.72)   | 6.51<br>(5.41–7.77)    | 8.73<br>(6.75–11.08)   | 4.27<br>(3.38–5.33)    |
| 65–               | 18.14<br>(14.89–22.02) | 24.14<br>(18.64–30.52) | 12.34<br>(9.81–15.65)  | 9.25<br>(7.75–10.86)   | 12.34<br>(9.76–15.39)  | 6.26<br>(5.00–7.69)    |
| 70–               | 25.70<br>(21.06–30.95) | 34.43<br>(26.73–43.40) | 17.39<br>(13.81–21.99) | 13.08<br>(11.11–15.43) | 17.55<br>(13.96–21.90) | 8.82<br>(7.14–10.76)   |
| 75–               | 29.09<br>(24.21–34.64) | 37.95<br>(30.31–46.80) | 21.11<br>(16.65–26.37) | 14.78<br>(12.61–17.21) | 19.26<br>(15.61–23.61) | 10.74<br>(8.71–13.06)  |
| 80–               | 25.42<br>(21.45–30.02) | 34.37<br>(27.92–41.69) | 18.42<br>(14.42–22.77) | 17.13<br>(14.66–19.76) | 23.09<br>(19.03–27.68) | 12.46<br>(10.04–14.92) |
| 85–               | 32.75<br>(27.51–38.41) | 54.62<br>(45.78–63.72) | 20.97<br>(16.21–26.45) | 21.82<br>(18.70–24.78) | 36.47<br>(31.13–42.12) | 13.93<br>(10.86–16.98) |
| 90–               | 28.04<br>(22.16–33.24) | 54.21<br>(44.12–65.19) | 22.60<br>(17.13–27.90) | 18.39<br>(14.96–21.36) | 35.61<br>(29.59–41.70) | 14.81<br>(11.27–17.86) |
| 95–               | 28.52<br>(21.26–35.73) | 49.97<br>(40.55–59.70) | 26.63<br>(19.08–34.22) | 18.66<br>(14.07–22.44) | 31.02<br>(25.12–36.64) | 17.57<br>(12.71–21.54) |

Data in parentheses are 95% uncertainty intervals.

**Supplementary Table 3. Age-standardized incidence, mortality and prevalence rates of lymphoma by province of China in 2019 (per 100,000 population).**

| Province       | Hodgkin lymphoma    |                     |                     | Non-Hodgkin lymphoma |                     |                        |
|----------------|---------------------|---------------------|---------------------|----------------------|---------------------|------------------------|
|                | Incidence           | Mortality           | Prevalence          | Incidence            | Mortality           | Prevalence             |
| Anhui          | 0.58<br>(0.41–0.75) | 0.15<br>(0.10–0.19) | 3.95<br>(2.83–5.13) | 5.67<br>(4.44–7.07)  | 2.61<br>(2.07–3.23) | 26.55<br>(19.82–34.92) |
| Beijing        | 0.76<br>(0.52–0.97) | 0.11<br>(0.07–0.14) | 5.96<br>(4.14–7.68) | 6.29<br>(5.04–7.62)  | 2.38<br>(1.93–2.88) | 35.36<br>(26.87–44.82) |
| Chongqing      | 0.51<br>(0.37–0.80) | 0.12<br>(0.09–0.19) | 3.60<br>(2.54–5.62) | 5.34<br>(4.15–6.81)  | 2.41<br>(1.89–3.04) | 25.68<br>(18.89–34.30) |
| Fujian         | 0.60<br>(0.45–0.78) | 0.13<br>(0.09–0.16) | 4.30<br>(3.22–5.76) | 5.35<br>(4.33–6.63)  | 2.33<br>(1.89–2.84) | 26.37<br>(19.83–34.13) |
| Gansu          | 0.30<br>(0.21–0.50) | 0.13<br>(0.09–0.22) | 1.57<br>(1.04–2.70) | 3.52<br>(2.87–4.36)  | 2.02<br>(1.65–2.43) | 9.48<br>(6.50–13.03)   |
| Guangdong      | 0.52<br>(0.39–0.68) | 0.11<br>(0.08–0.14) | 3.81<br>(2.85–4.99) | 3.87<br>(3.12–4.77)  | 1.66<br>(1.37–2.00) | 16.65<br>(12.06–22.04) |
| Guangxi        | 0.44<br>(0.33–0.61) | 0.16<br>(0.12–0.21) | 2.59<br>(1.91–3.61) | 4.39<br>(3.44–5.44)  | 2.29<br>(1.78–2.87) | 15.64<br>(10.88–21.22) |
| Guizhou        | 0.24<br>(0.14–0.49) | 0.13<br>(0.07–0.25) | 1.06<br>(0.58–2.22) | 3.67<br>(2.76–4.81)  | 2.35<br>(1.80–3.06) | 7.62<br>(4.52–11.14)   |
| Hainan         | 0.33<br>(0.20–0.56) | 0.12<br>(0.08–0.19) | 1.94<br>(1.19–3.42) | 4.11<br>(3.16–5.17)  | 2.16<br>(1.71–2.69) | 14.50<br>(10.14–19.56) |
| Hebei          | 0.73<br>(0.41–0.99) | 0.21<br>(0.12–0.29) | 4.79<br>(2.69–6.63) | 5.64<br>(4.54–6.98)  | 2.67<br>(2.14–3.23) | 23.01<br>(16.85–30.72) |
| Heilongjiang   | 0.59<br>(0.43–0.78) | 0.16<br>(0.11–0.21) | 3.92<br>(2.87–5.31) | 4.59<br>(3.69–5.69)  | 2.16<br>(1.77–2.63) | 19.35<br>(14.20–25.59) |
| Henan          | 0.52<br>(0.39–0.72) | 0.13<br>(0.10–0.18) | 3.50<br>(2.61–5.00) | 4.04<br>(3.28–5.05)  | 1.85<br>(1.48–2.28) | 16.53<br>(11.57–22.26) |
| Hubei          | 0.57<br>(0.40–0.75) | 0.15<br>(0.10–0.20) | 3.86<br>(2.73–5.12) | 5.26<br>(4.15–6.71)  | 2.45<br>(1.96–3.05) | 23.79<br>(17.66–31.24) |
| Hunan          | 0.41<br>(0.30–0.62) | 0.13<br>(0.10–0.20) | 2.49<br>(1.81–3.85) | 5.65<br>(4.61–7.00)  | 2.84<br>(2.27–3.49) | 23.67<br>(17.79–30.94) |
| Inner Mongolia | 0.44<br>(0.31–0.73) | 0.12<br>(0.08–0.19) | 2.98<br>(2.04–5.03) | 5.51<br>(4.40–6.82)  | 2.59<br>(2.07–3.19) | 24.63<br>(18.56–32.53) |
| Jiangsu        | 0.80<br>(0.48–1.10) | 0.15<br>(0.08–0.21) | 5.97<br>(3.62–8.16) | 5.92<br>(4.59–7.55)  | 2.45<br>(1.92–3.07) | 30.52<br>(22.58–39.83) |
| Jiangxi        | 0.46<br>(0.34–0.58) | 0.16<br>(0.12–0.20) | 2.71<br>(2.02–3.58) | 4.17<br>(3.36–5.12)  | 2.14<br>(1.75–2.60) | 15.77<br>(11.43–20.97) |
| Jilin          | 0.55<br>(0.41–0.71) | 0.14<br>(0.10–0.17) | 3.81<br>(2.80–5.04) | 5.14<br>(4.26–6.35)  | 2.31<br>(1.98–2.81) | 24.38<br>(18.72–32.03) |
| Liaoning       | 0.83<br>(0.49–1.10) | 0.18<br>(0.10–0.24) | 6.02<br>(3.60–7.91) | 6.67<br>(5.37–8.27)  | 2.86<br>(2.32–3.53) | 34.85<br>(26.59–45.51) |
| Ningxia        | 0.41<br>(0.29–0.66) | 0.13<br>(0.09–0.20) | 2.63<br>(1.80–4.37) | 4.25<br>(3.34–5.27)  | 2.10<br>(1.64–2.62) | 15.87<br>(11.49–21.08) |
| Qinghai        | 0.25<br>(0.14–0.51) | 0.14<br>(0.08–0.29) | 0.98<br>(0.51–2.09) | 3.74<br>(2.94–4.68)  | 2.51<br>(1.98–3.08) | 6.63<br>(4.08–9.84)    |
| Shaanxi        | 0.40<br>(0.28–0.62) | 0.13<br>(0.09–0.19) | 2.53<br>(1.71–4.03) | 4.33<br>(3.35–5.52)  | 2.16<br>(1.66–2.68) | 17.11<br>(11.99–23.12) |
| Shandong       | 0.67<br>(0.48–0.85) | 0.13<br>(0.09–0.16) | 4.92<br>(3.54–6.32) | 4.48<br>(3.57–5.55)  | 1.85<br>(1.50–2.26) | 21.42<br>(15.37–27.65) |
| Shanghai       | 0.63<br>(0.45–0.84) | 0.10<br>(0.07–0.13) | 4.88<br>(3.54–6.55) | 6.87<br>(5.49–8.40)  | 2.75<br>(2.21–3.33) | 38.57<br>(29.69–49.20) |
| Shanxi         | 0.46<br>(0.32–0.72) | 0.12<br>(0.09–0.19) | 3.12<br>(2.11–4.99) | 5.44<br>(4.19–6.74)  | 2.55<br>(1.96–3.13) | 24.69<br>(18.03–32.43) |

|            |                     |                     |                       |                     |                     |                        |
|------------|---------------------|---------------------|-----------------------|---------------------|---------------------|------------------------|
| Sichuan    | 0.49<br>(0.36–0.67) | 0.15<br>(0.12–0.21) | 3.07<br>(2.24–4.36)   | 5.55<br>(4.38–6.95) | 2.76<br>(2.22–3.43) | 22.90<br>(16.77–30.97) |
| Tianjin    | 0.68<br>(0.49–0.88) | 0.12<br>(0.08–0.15) | 5.15<br>(3.81–6.75)   | 6.73<br>(5.39–8.30) | 2.73<br>(2.18–3.29) | 36.88<br>(27.86–46.98) |
| Tibet      | 0.25<br>(0.14–0.51) | 0.20<br>(0.11–0.40) | 0.53<br>(0.29–1.08)   | 3.01<br>(2.34–3.81) | 2.72<br>(2.11–3.39) | 2.12<br>(0.73–3.93)    |
| Xinjiang   | 0.50<br>(0.32–0.66) | 0.26<br>(0.17–0.34) | 2.19<br>(1.37–3.00)   | 3.90<br>(3.20–4.86) | 2.45<br>(2.00–3.02) | 8.78<br>(5.72–12.55)   |
| Yunnan     | 0.30<br>(0.20–0.52) | 0.15<br>(0.10–0.25) | 1.39<br>(0.89–2.46)   | 3.52<br>(2.85–4.33) | 2.17<br>(1.78–2.65) | 8.58<br>(5.68–11.99)   |
| Zhejiang   | 1.02<br>(0.50–1.45) | 0.18<br>(0.08–0.25) | 7.71<br>(3.87–10.92)  | 4.68<br>(3.82–5.73) | 1.89<br>(1.52–2.29) | 23.17<br>(17.39–30.12) |
| Hong Kong* | 1.10<br>(0.65–1.54) | 0.11<br>(0.07–0.15) | 8.83<br>(5.23–12.51)  | 5.25<br>(3.94–7.03) | 2.13<br>(1.60–2.83) | 27.69<br>(19.36–37.78) |
| Macao*     | 1.29<br>(0.59–1.94) | 0.13<br>(0.06–0.20) | 10.36<br>(4.76–15.60) | 4.17<br>(3.09–5.60) | 1.63<br>(1.21–2.18) | 21.13<br>(14.69–29.02) |

\*Special administrative regions. Data in parentheses are 95% uncertainty intervals.
